# Supplementary material
Source: Springer Nature journal article supplement (https://www.springermedizin.de/resource/supplementary/12936_2008_838_MOESM7_ESM.pdf/9549056)

# DHPS 437-540

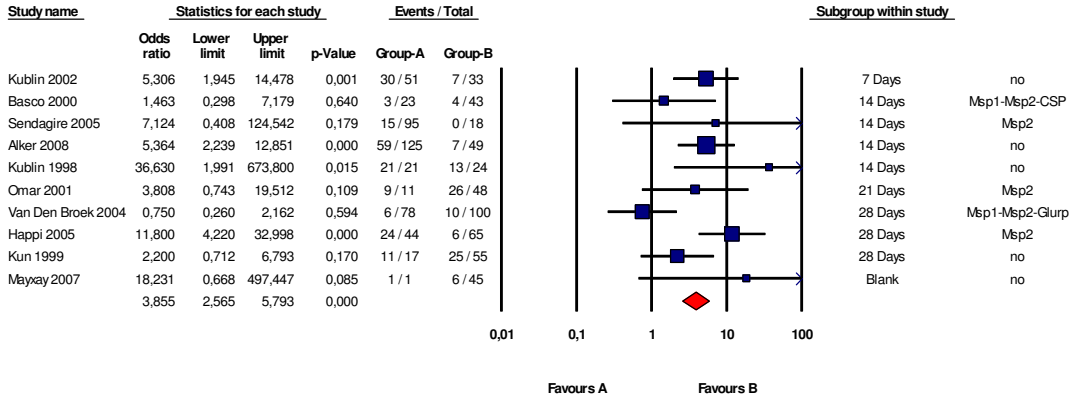

Supplement: MOESM7 [file 9549056]
